# Supplementary material
Source: MDPI journal article supplement (https://www.mdpi.com/1660-4601/11/7/6940)
Supplement: s1 [file s1]

*Supplementary Information*

## **Association of Seasonal Climate Variability and Age-Specific Mortality in Northern Sweden before the Onset of Industrialization**

**Joacim Rocklöv <sup>1</sup>, Sören Edvinsson <sup>2</sup>, Per Arnqvist <sup>3</sup>, Sara Sjöstedt de Luna <sup>3</sup> and Barbara Schumann <sup>1,4,\*</sup>**

<sup>1</sup> Centre for Global Health Research, Department of Public Health and Clinical Medicine, Umeå University, Umeå 90187, Sweden; E-Mail: joacim.rocklov@umu.se;

<sup>2</sup> Demographic Database, Umeå University, Umeå 90187, Sweden; E-Mail: soren.edvinsson@ddb.umu.se

<sup>3</sup> Department of Mathematics and Mathematical Statistics, Umeå University, Umeå 90187, Sweden; E-Mails: per.arnqvist@math.umu.se (P.A.); sara.de.luna@math.umu.se (S.S.L.)

<sup>4</sup> Ageing and Living Conditions Programme, Umeå University, Umeå 90187, Sweden

\* Author to whom correspondence should be addressed; E-Mail: barbara.schumann@umu.se; Tel.: +46-90-786-62-42; Fax: +46-90-785-13-33.

---

This supplementary materials support the main text by providing sex and age-specific results. Table S1 shows total, sex- and age-stratified relative risks by annual climate variability. In table S2, total and sex-stratified relative risks by seasonal climate variability are shown.

**Table S1.** Annual climate variability and annual mortality: Total, sex- and age-stratified associations, Skellefteå 1749–1859.

|                      | Age Groups (Years), Men + Women |                    |             |             |             |             |                    |             |                    |                    |
|----------------------|---------------------------------|--------------------|-------------|-------------|-------------|-------------|--------------------|-------------|--------------------|--------------------|
|                      | All                             | MEN                | WOMEN       | <1          | 1–2         | 3–9         | 10–14              | 15–24       | 25–49              | ≥50                |
|                      | RR (CI)                         | RR (CI)            | RR (CI)     | RR (CI)     | RR (CI)     | RR (CI)     | RR (CI)            | RR (CI)     | RR (CI)            | RR (CI)            |
| <b>Annual</b>        | <i>0.94</i>                     | <i>0.94</i>        | 0.95        | 1.00        | 0.99        | 0.86        | <b>0.76</b>        | 0.89        | <i>0.92</i>        | <b>0.91</b>        |
| <b>temperature</b>   | <i>(0.88–1.01)</i>              | <i>(0.87–1.01)</i> | (0.88–1.02) | (0.93–1.07) | (0.88–1.12) | (0.69–1.08) | <b>(0.61–0.94)</b> | (0.77–1.02) | <i>(0.83–1.01)</i> | <b>(0.85–0.97)</b> |
| <b>Annual</b>        | 1.00                            | 1.01               | 1.00        | 1.00        | 1.00        | 1.00        | 1.00               | 1.01        | <i>1.01</i>        | <b>1.01</b>        |
| <b>precipitation</b> | <i>(0.99–1.01)</i>              | <i>(1.00–1.01)</i> | (0.99–1.01) | (0.99–1.00) | (0.99–1.01) | (0.98–1.02) | (0.97–1.02)        | (0.99–1.02) | <i>(1.00–1.02)</i> | <b>(1.00–1.02)</b> |

Adjusted model: Annual temperature and precipitation adjusted for each other; RR, relative risk; CI, 95% confidence interval; RR indicate mortality risk by 1 °C increase in temperature resp. 1 cm increase in precipitation; Numbers in **bold**: significant ( $p$ -value < 0.05); numbers in *italics*: borderline significant ( $p$ -value < 0.10); Temperature: Mean temperature in °C; Precipitation: Cumulative precipitation in cm.

**Table S2.** Seasonal climate variability and annual mortality: Total and sex-stratified associations, Skellefteå 1749–1859.

|                      | Total Mortality                   |                         | Mortality (Men)                   |                         | Mortality (Women)                 |                         |
|----------------------|-----------------------------------|-------------------------|-----------------------------------|-------------------------|-----------------------------------|-------------------------|
|                      | Simple season-wise model *        | Fully adjusted model ** | Fully adjusted model **           | Fully adjusted model ** | Fully adjusted model **           | Fully adjusted model ** |
|                      | RR (CI)                           | $p$ -value              | RR (CI)                           | $p$ -value              | RR (CI)                           | $p$ -value              |
| Winter temperature   | <b>0.97</b><br><b>(0.95–0.99)</b> | <b>0.007</b>            | <i>0.98</i><br><i>(0.95–1.00)</i> | <i>0.057</i>            | <b>0.97</b><br><b>(0.95–1.00)</b> | <b>0.033</b>            |
| Winter precipitation | 1.00<br>(0.97–1.03)               | 0.783                   | 0.99<br>(0.95–1.02)               | 0.343                   | 0.99<br>(0.96–1.02)               | 0.567                   |
| Spring temperature   | <b>0.95</b><br><b>(0.91–0.98)</b> | <b>0.005</b>            | 0.96<br>(0.91–1.01)               | 0.103                   | 0.97<br>(0.92–1.02)               | 0.248                   |
| Spring precipitation | 0.99<br>(0.97–1.01)               | 0.200                   | <i>0.98</i><br><i>(0.97–1.00)</i> | <i>0.085</i>            | 0.99<br>(0.97–1.01)               | 0.142                   |

Table S2. Cont.

|                      | Total Mortality                   |                 |                                   |                 | Mortality (men)                   |                 | Mortality (women)                 |                 |
|----------------------|-----------------------------------|-----------------|-----------------------------------|-----------------|-----------------------------------|-----------------|-----------------------------------|-----------------|
|                      | Simple season-wise model *        |                 | Fully adjusted model **           |                 | Fully adjusted model **           |                 | Fully adjusted model **           |                 |
|                      | RR (CI)                           | <i>p</i> -value | RR (CI)                           | <i>p</i> -value | RR (CI)                           | <i>p</i> -value | RR (CI)                           | <i>p</i> -value |
| Summer temperature   | 1.01<br>(0.95–1.08)               | 0.692           | 1.04<br>(0.97–1.10)               | 0.300           | 1.02<br>(0.95–1.10)               | 0.541           | 1.05<br>(0.98–1.12)               | 0.173           |
| Summer precipitation | <i>1.01</i><br><i>(1.00–1.03)</i> | <i>0.050</i>    | 1.01<br>(0.99–1.02)               | 0.294           | 1.01<br>(0.99–1.02)               | 0.431           | 1.01<br>(1.00–1.02)               | 0.226           |
| Autumn temperature   | 0.99<br>(0.94–1.04)               | 0.674           | 1.00<br>(0.94–1.05)               | 0.898           | 1.00<br>(0.94–1.05)               | 0.861           | 1.00<br>(0.94–1.06)               | 0.941           |
| Autumn precipitation | 1.01<br>(1.00–1.02)               | 0.120           | <b>1.02</b><br><b>(1.00–1.03)</b> | <b>0.036</b>    | <b>1.02</b><br><b>(1.00–1.03)</b> | <b>0.033</b>    | <i>1.02</i><br><i>(1.00–1.03)</i> | <i>0.063</i>    |

\* Simple model: Seasonal temperature and precipitation adjusted for each other; each season separately; \*\* Fully adjusted model: Seasonal temperature and precipitation adjusted for each other; all seasons simultaneously included. RR, relative risk; CI, 95% confidence interval. RR indicate mortality risk by 1 °C increase in temperature resp. 1 cm increase in precipitation. Numbers in **bold**: significant (*p*-value <0.05); numbers in *italics*: borderline significant (*p*-value <0.10). Temperature: Mean temperature in °C. Precipitation: Cumulative precipitation in cm.
